# Supplementary material for: The Future of Women in Psychological Science
Source: PubMed Central journal article supplement — Perspect Psychol Sci. 2020 Sep 9;16(3):483–516. doi: 10.1177/1745691620952789 (PMC8114333; doi:10.1177/1745691620952789), 2020-09-09
Supplement: Gruber_Supplemental_Material_Table_S5.pdf [file Gruber_Supplemental_Material_Table_S5.pdf]

Table S5

*Summary of Climate Surveys Assessed*

| University                              | Year | N*                                                             | URL                                                                                                                                                                                                                                                           |
|-----------------------------------------|------|----------------------------------------------------------------|---------------------------------------------------------------------------------------------------------------------------------------------------------------------------------------------------------------------------------------------------------------|
| Brown University                        | 2016 | N = 299<br>108 Female<br>191 Male                              | <a href="https://www.brown.edu/about/administration/institutional-research/surveys/faculty-climate-survey">https://www.brown.edu/about/administration/institutional-research/surveys/faculty-climate-survey</a>                                               |
|                                         |      |                                                                |                                                                                                                                                                                                                                                               |
| Harvard University                      | 2013 | N not specified<br>M/F breakdown not specified                 | <a href="https://faculty.harvard.edu/faculty-climate-survey">https://faculty.harvard.edu/faculty-climate-survey</a>                                                                                                                                           |
|                                         |      |                                                                |                                                                                                                                                                                                                                                               |
| University of California, San Francisco | 2017 | N = 1,158<br>44% Female<br>56% Male                            | <a href="http://academicaffairs.ucsf.edu/FacultyClimateSurvey/index.php">http://academicaffairs.ucsf.edu/FacultyClimateSurvey/index.php</a>                                                                                                                   |
|                                         |      |                                                                |                                                                                                                                                                                                                                                               |
| University of Michigan                  | 2016 | 71% of N = 1,500 invited<br>42% Female<br>57% Male<br>1% Other | <a href="https://diversity.umich.edu/wp-content/uploads/2017/11/DEI-FACULTY-REPORT-FINAL.pdf">https://diversity.umich.edu/wp-content/uploads/2017/11/DEI-FACULTY-REPORT-FINAL.pdf</a>                                                                         |
|                                         |      |                                                                |                                                                                                                                                                                                                                                               |
| University of New Hampshire             | 2014 | N = 354<br>140 Male<br>114 Female                              | <a href="https://www.unh.edu/sites/www.unh.edu/files/departments/unh_advance/PDFs/climate_study-perceptions_2014-2_final0814.pdf">https://www.unh.edu/sites/www.unh.edu/files/departments/unh_advance/PDFs/climate_study-perceptions_2014-2_final0814.pdf</a> |
|                                         |      |                                                                |                                                                                                                                                                                                                                                               |

|                                    |                                                                                                                                                                                                                                                                                                  |                                                             |                                                                                                                                                                                                                                                                                             |
|------------------------------------|--------------------------------------------------------------------------------------------------------------------------------------------------------------------------------------------------------------------------------------------------------------------------------------------------|-------------------------------------------------------------|---------------------------------------------------------------------------------------------------------------------------------------------------------------------------------------------------------------------------------------------------------------------------------------------|
|                                    | e.g., “I feel excluded from informal networks in my department.”<br>Scores 1-4, higher value indicates more fit. Tenure track F: 2.92, tenure track M: 3.05 (not significant). Tenure track faculty in STEM disciplines F: 2.93, Tenure track faculty in STEM disciplines M: 3.13 ( $p < .05$ ). |                                                             |                                                                                                                                                                                                                                                                                             |
| University of Wisconsin            | 2016                                                                                                                                                                                                                                                                                             | N = 1,285<br>36% Female<br>61% Male<br>3% Other/No response | <a href="http://wiseli.engr.wisc.edu/docs/Report_Wave5_2016TT.pdf">http://wiseli.engr.wisc.edu/docs/Report_Wave5_2016TT.pdf</a><br>Specifically for tenure track STEM faculty                                                                                                               |
|                                    | Sample item: In my department, the overall climate is ...<br>Scores 1–5, higher value indicates more positive. F: 3.77, M: 4.02, $p < .05$                                                                                                                                                       |                                                             |                                                                                                                                                                                                                                                                                             |
| Washington University in St. Louis | 2015                                                                                                                                                                                                                                                                                             | N=329<br>108 Female<br>221 Male                             | <a href="https://provost.wustl.edu/wp-content/uploads/2016/03/2-WU-Faculty-Work-Life-Survey-AS-Tenured-Tenure-Track-Faculty-Updated-2016.03.pdf">https://provost.wustl.edu/wp-content/uploads/2016/03/2-WU-Faculty-Work-Life-Survey-AS-Tenured-Tenure-Track-Faculty-Updated-2016.03.pdf</a> |
|                                    | Sample item: The department is a good fit.<br>Scores 1–5, higher value indicates more agreement. F: 3.8, M: 4.2, $p < .05$                                                                                                                                                                       |                                                             |                                                                                                                                                                                                                                                                                             |

*Note.* Sample sizes and demographic makeup are listed as reported in the original source, hence the different formats and categories. These surveys were identified through a Google search for “faculty climate surveys.” No surveys found were excluded, except those that were identified but were not publicly accessible (Boston University, Case Western Reserve University).
